# Supplementary material
Source: PubMed Central journal article supplement (PMC4224154)
Supplement: 84a970f8211c10de3a821f3bc6044cbb_genetics.114.167346-2.pdf [file 84a970f8211c10de3a821f3bc6044cbb_genetics.114.167346-2.pdf]

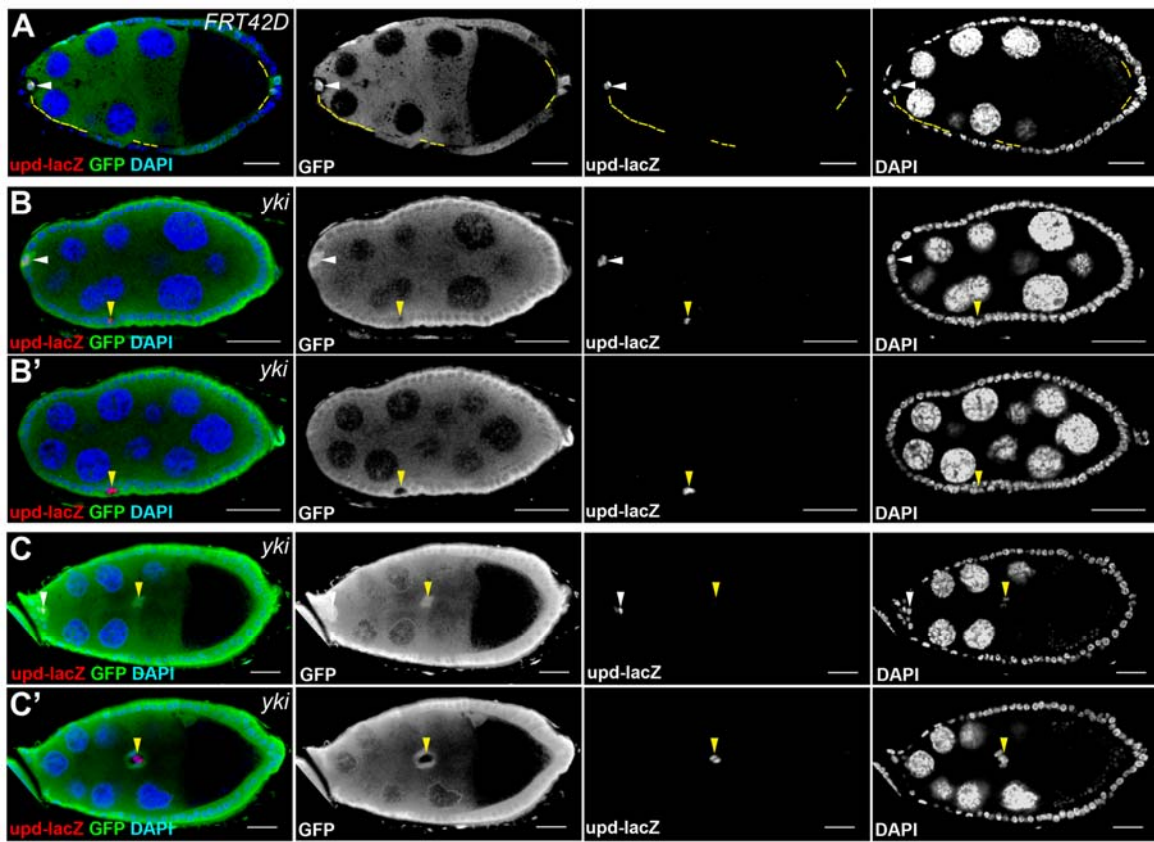

**Figure S2 Yki suppresses *upd* expression and controls border cell induction and migration.**

Mitotic clones of *FRT42D* (A) or *FRT42D yki<sup>B5</sup>* (B, C) were generated in an *upd-lacZ* background and examined six days after clone induction. The ovaries were immunostained with anti- $\beta$ -Gal and anti-GFP. (A) *upd-lacZ* was expressed in polar cells (white arrowheads) but not GFP-negative *FRT42D* cells (marked by yellow dashed lines). (B, B') Two focal planes of an egg chamber. A border cell cluster with GFP-positive polar cells (white arrowheads) expressed *upd-lacZ*. *yki* mutant cells (yellow arrowheads) also expressed *upd-lacZ* ectopically. (C, C') Two border cell clusters on different focal planes of an egg chamber. One cluster with wild-type GFP-positive polar cells expressing *upd-lacZ* remained at the anterior end (white arrowheads). The other cluster with GFP-negative *yki* mutant polar cells expressing *upd-lacZ* was migrating toward the oocyte (yellow arrowheads). Length of scale bar is 20  $\mu$ m for all panels.
