# Supplementary material
Source: PubMed Central journal article supplement (PMC4224154)
Supplement: c21486900dc8587063b94569db6019e4_genetics.114.167346-4.pdf [file c21486900dc8587063b94569db6019e4_genetics.114.167346-4.pdf]

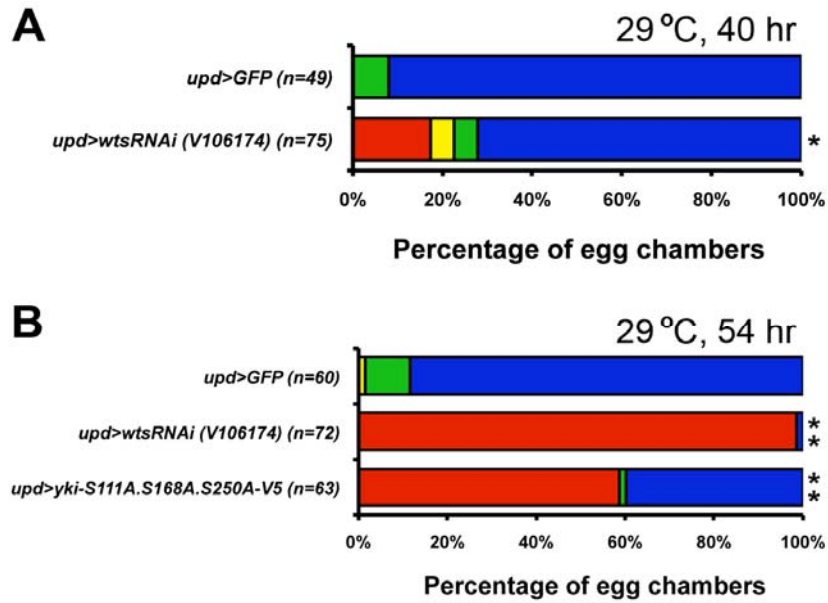

**Figure S1 The Hippo pathway regulates border cell migration after polar cell specification.**

*upd-Gal4* was used to knockdown or over-express genes in polar cells. The temperature-sensitive Gal80 system was adapted to control knockdown or expression of genes temporally. *UAS-GFP* was used as a control. (A) Quantification and percentage distribution of border cell migration after adult flies were incubated at 29°C for 40 hours. Knockdown of *wts* in polar cells attenuated border cell migration. (B) Quantification and percentage distribution of border cell migration after adult flies were incubated at 29°C for 54 hours. Knockdown of *wts* or over-expression of *yki-3SA* in polar cells severely attenuated border cell migration. Wilcoxon rank-sum test, \*:  $p < 0.05$ , \*\*:  $p < 0.01$ .
