# Supplementary material
Source: PubMed Central journal article supplement (PMC4224154)
Supplement: dc520733ffbef90cae95d1b3b7c56f62_genetics.114.167346-5.pdf [file dc520733ffbef90cae95d1b3b7c56f62_genetics.114.167346-5.pdf]

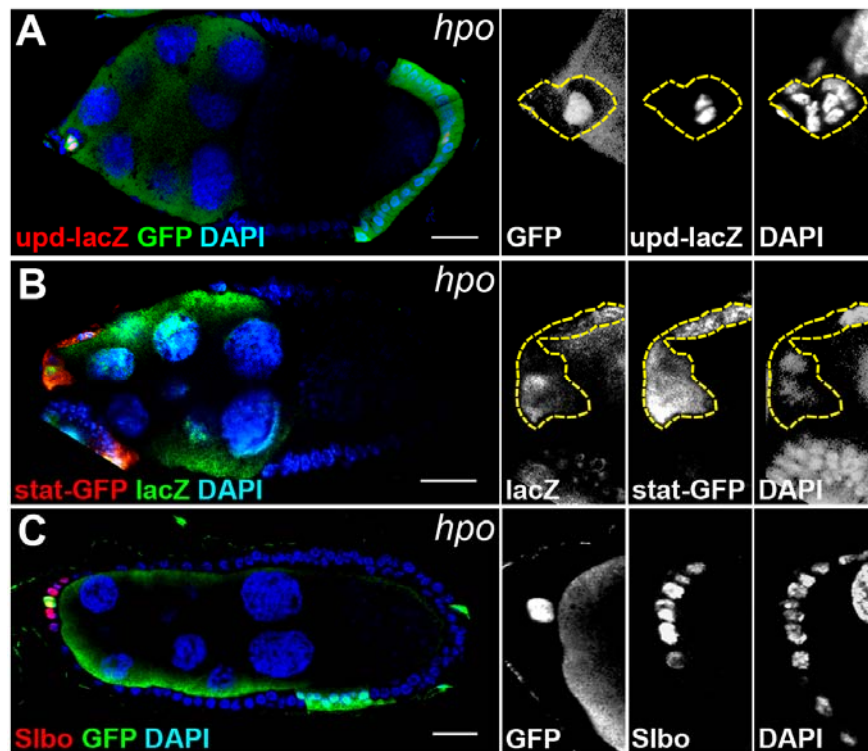

**Figure S3 The Hippo pathway in outer border cells does not control JAK/STAT signaling in border cell clusters.**

Mitotic clones of *FRT42D hpo<sup>42-47</sup>* were generated and examined six days after clone induction. Egg chambers at stages 9 or 10 were selected and oriented as anterior towards the left. High magnification views of the border cell cluster are shown in the panels on the right. The ovaries were immunostained with anti-GFP, anti- $\beta$ -Gal (A, B), and anti-Slbo (C). (A) *hpo* mutant clones labeled by the absence of GFP were generated in an *upd-lacZ* background. A border cell cluster with *hpo* mutant outer border cells and GFP-positive control polar cells showed normal *upd-lacZ* expression in polar cells. (B) *hpo* mutant clones labeled by the absence of  $\beta$ -Gal were generated in a *stat-GFP* background. A border cell cluster with *hpo* mutant outer border cells and  $\beta$ -Gal-positive control polar cells showed normal *stat-GFP* expression in outer polar cells. (C) *hpo* mutant clone labeled by the absence of GFP were generated. A border cell cluster with *hpo* mutant outer border cells and GFP-positive control polar cells were positive for Slbo. Length of scale bar is 20  $\mu$ m for all panels.
