# Supplementary material
Source: PubMed Central journal article supplement (PMC4224154)
Supplement: e483dd3542b0592b772557d76b632581_genetics.114.167346-3.pdf [file e483dd3542b0592b772557d76b632581_genetics.114.167346-3.pdf]

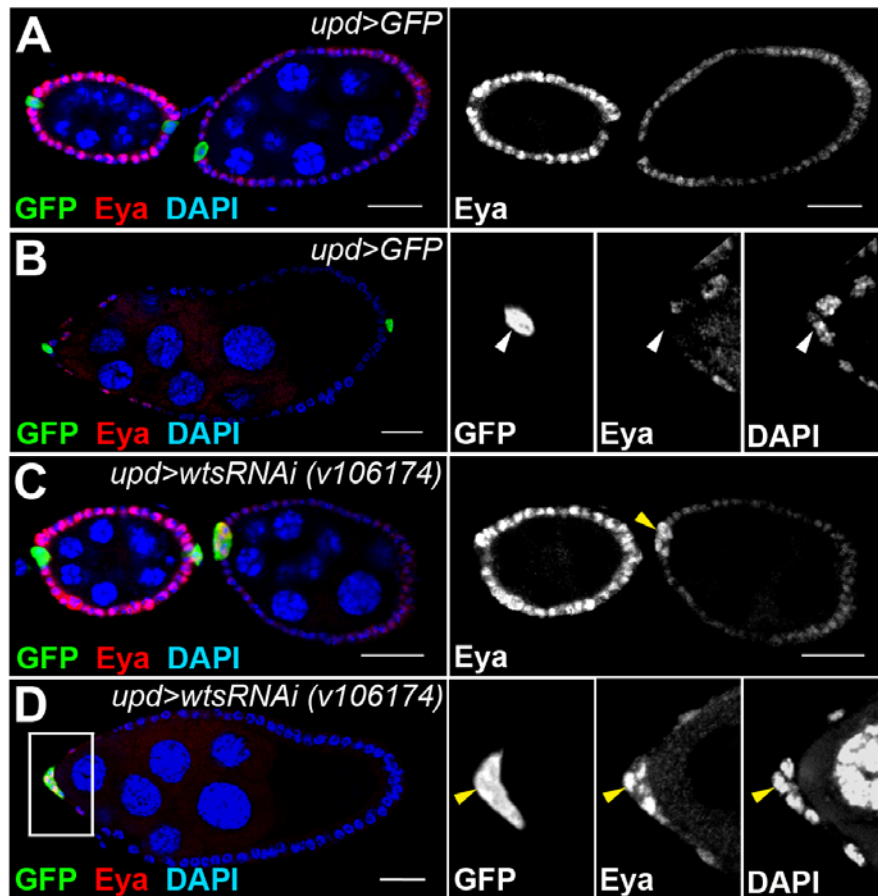

**Figure S4 The Hippo pathway decreases the level of Eya in polar cells.**

*wts* was knocked down in polar cells by using *upd-Gal4*. *UAS-GFP* was used as a control (A, C). The ovaries were immunostained with anti-Fas3 and anti-Eya. Egg chambers at stages 5, 7 (A, C), and stage 9 (B, D) were selected and oriented as anterior towards the left. High magnification views of border cell clusters at stage 9 are shown in the panels on the right. (A) In the control, Eya was detected in main-body follicle cells but not polar cells. The level of Eya was reduced when main-body follicle cells entered endoreplication after stage 6. (B) In the control, low level of Eya was detected in outer border cells and stretch cells at stage 9. No Eya was detected in polar cells (white arrowheads). (C) Eya was detected in *wts*-knockdown cells at stage 7 (yellow arrowheads) but not stage 5 (yellow arrows). (D) Eya was detected in *wts*-knockdown cells at stage 9 (yellow arrowheads). Length of scale bar is 20  $\mu$ m for all panels.
